# Supplementary material
Source: HighWire-hosted journal article supplement (https://bmjopenquality.bmj.com/highwire/filestream/136007/field_highwire_adjunct_files/1/ds4637.xlsx)
Supplement: ds4637.xlsx [file ds4637.xlsx]

## Sheet: Sheet1
CYCLE 1
Ward	Anon patient number	Admission Date	Documentation in notes of ceiling of care	Free text box (how is this decision documented?)	Date of documentation of latest decision	Documentation of ceiling of care in alert system on Rio	Documentation of ceiling of care in MDT notes (complete documentation)	Ceiling of Care Decision (0=full active treatment and CPR, 1= DNAR, full active treatment, 2=not for transfer, treatment on ward, 3= not for transfer, palliate, 4=other (please specify in free text box))	Free Text Box
W	1	2014-12-08	Y	MDT notes. States plan for further discussion with family.	2014-12-10	N	Y	0
W	2	2014-11-25	Y	MDT notes state for CPR, full active treatment therefore as default	2014-12-03	N	Y	0
W	3	2014-11-14	Y	MDT notes state not for CPR and not for transfer to acute hospital	2014-12-10	N	Y	2
W	4	2014-11-02	Y	MDT notes state for CPR, full active treatment therefore as default	2014-11-05	N	Y	0
W	5	2014-10-29	Y	MDT notes state for CPR, full active treatment therefore as default	2014-11-05	N	Y	0
W	6	2014-10-27	Y	Consultant progress notes state not for CPR and not for transfer to acute hospital	2014-12-04	N	N	2
W	7	2014-10-24	Y	MDT notes state not for CPR but for transfer and active treatment	2014-12-10	Y	Y	1
W	8	2014-10-15	Y	MDT notes state for CPR, full active treatment therefore as default	2014-10-22	N	Y	0
W	9	2014-10-08	Y	MDT notes state for CPR, full active treatment therefore as default	2014-10-15	N	Y	0
W	10	2014-09-19	Y	MDT notes state for CPR, full active treatment therefore as default	2014-09-24	N	Y	0
W	11	2014-09-16	Y	MDT notes state not for CPR but for transfer and active treatment as default	2014-09-17	N	Y	1
W	12	2014-09-15	Y	MDT notes state for CPR, full active treatment therefore as default	2014-09-17	N	Y	0
W	13	2014-08-08	Y	MDT notes state for CPR, full active treatment therefore as default	2014-08-11	N	Y	0
W	14	2014-05-13	Y	Consultant progress notes state not for CPR and not for transfer to acute hospital. NB decision made months prior to QIP	2014-08-18	Y	N	2
CYCLE 2
Ward	Anon number	Admission Date	Documentation in notes of ceiling of care	Free text box (how is this decision documented?)	Date of documentation of latest decision	Documentation of ceiling of care in alert system on Rio	Documentation of ceiling of care in MDT notes (complete documentation)	Ceiling of Care Decision (0=full active treatment and CPR, 1= DNAR, full active treatment, 2=not for transfer, treatment on ward, 3= not for transfer, palliate, 4=other (please specify in free text box))	Free Text Box
W	1	2014-08-08	Y	MDT notes for CPR, for transfer to the general	2015-01-07	N	Y	0
W	2	2014-12-23	Y	MDT notes for CPR, as default for transfer	2015-01-07	N	Y	0
W	3	2015-01-08	N	Not yet seen by consultant	not recorded	N	N
W	4	2014-12-08	Y	Notes say not for resus in progress	2014-12-11	Y	Y	0	conflicting MDT notes say for resus and progress notes say DNACPR
W	5	2014-05-13	Y	Not for resus, not for transfer, decision made prior to QIP	2014-08-18	Y	N	2
W	6	2014-10-08	Y	MDT notes state for CPR, full active treatment therefore as default	2014-10-15	N	Y	0
W	7	2014-10-24	Y	MDT notes state not for CPR but for transfer and active treatment	2014-12-10	Y	Y	1
W	8	2014-09-19	Y	MDT notes state for CPR, full active treatment therefore as default	2014-09-24	N	Y	0
W	9	2014-11-02	Y	MDT notes state for CPR, full active treatment therefore as default	2014-11-05	N	Y	0
W	10	2014-09-16	Y	MDT notes state not for CPR but for transfer and active treatment as default	2014-09-17	N	Y	1
W	11	2014-12-20	Y	MDT notes for CPR, as default for transfer	2015-01-07	N	Y	0
W	12	2015-01-02	Y	In progress note not for CPR but active treatment and transfer	2015-01-02	Y	Y	1	conflicting MDT notes say for resus and progress notes say DNACPR
W	13	2014-11-14	Y	MDT notes state not for CPR but for transfer to acute hospital	2015-01-07	N	Y	1	Changed from 2 to a 1 since last PDSA cycle
W	14	2014-10-15	Y	MDT notes state for CPR, full active treatment therefore as default	2014-10-22	N	Y	0
W	15	2014-10-27	Y	Consultant progress notes state not for CPR and not for transfer to acute hospital	2014-12-04	Y	N	2	Alert now says not for transfer in addition to not for CPR
W	16	2014-11-25	Y	MDT notes state for CPR, full active treatment therefore as default	2014-12-03	N	Y	0
W	17	2014-12-29	Y	Not for resus, not for transfer to general hospital	2014-01-05	Y	Y	3	Clearly documented in both alerts and MDT notes
